# Supplementary material for: Novel Biomarkers Distinguishing Active Tuberculosis from Latent Infection Identified by Gene Expression Profile of Peripheral Blood Mononuclear Cells
Source: PLoS One. 2011 Aug 31;6(8):e24290. doi: 10.1371/journal.pone.0024290 (PMC3164189; doi:10.1371/journal.pone.0024290)
Supplement: Table S1 — GO analysis of differentially expressed genes. (XLS) [file pone.0024290.s002.xls]

## Sheet: Sheet1
LTBI/HC
GO ACCESSION	GO Term	Percent(%)	P-value	Corrected P-value
GO:0044421	extracellular region part	1.2959	0.0002	0.0114
GO:0005615	extracellular space	1.49477	0.0002	0.0114
GO:0042330	taxis	3.14465	0.0005	0.022
TB/LTBI
GO ACCESSION	GO Term	Percent(%)	P-value	Corrected P-value
GO:0009605	response to external stimulus	2.58824	0.0002	0.046
TB/HC
GO ACCESSION	GO Term	Percent(%)	P-value	Corrected P-value
GO:0007154	cell communication	1.01715	3.23265e-05	0.0324391
GO:0007166	cell surface receptor linked signal transduction	0.535834	4.83115e-05	0.0324391
GO:0007267	cell-cell signaling	1.57978	4.9247e-05	0.0324391
GO:0008009	chemokine activity	10.8696	3.28733e-05	0.0324391
GO:0042379	chemokine receptor binding	10.4167	4.05392e-05	0.0324391
GO:0006935	chemotaxis	5.03145	5.52064e-06	0.0181679
GO:0005125	cytokine activity	4	8.34713e-07	0.00597735
GO:0006952	defense response	1.8018	4.04174e-05	0.0324391
GO:0044421	extracellular region part	1.72786	4.98299e-05	0.0324391
GO:0005615	extracellular space	2.39163	9.43943e-05	0.0461967
GO:0001664	G-protein-coupled receptor binding	4.38596	3.74645e-05	0.0324391
GO:0006954	inflammatory response	3.28947	6.34269e-06	0.0181679
GO:0045608	negative regulation of auditory receptor cell differentiation	100	6.4249e-05	0.0340804
GO:0050672	negative regulation of lymphocyte proliferation	3.22581	0.000106444	0.0461967
GO:0045632	negative regulation of mechanoreceptor differentiation	100	6.4249e-05	0.0340804
GO:0032945	negative regulation of mononuclear cell proliferation	3.22581	0.000106444	0.0461967
GO:0045911	positive regulation of DNA recombination	37.5	2.76829e-05	0.0324391
GO:0045830	positive regulation of isotype switching	37.5	2.76829e-05	0.0324391
GO:0048304	positive regulation of isotype switching to IgG isotypes	50	1.00043e-05	0.0204686
GO:0045582	positive regulation of T cell differentiation	3.44828	8.13555e-05	0.0416132
GO:0005102	receptor binding	1.16279	5.80237e-05	0.0340804
GO:0045191	regulation of isotype switching	25	0.000106217	0.0461967
GO:0048302	regulation of isotype switching to IgG isotypes	37.5	2.76829e-05	0.0324391
GO:0050670	regulation of lymphocyte proliferation	1.19048	5.8854e-05	0.0340804
GO:0032944	regulation of mononuclear cell proliferation	1.17647	6.29099e-05	0.0340804
GO:0050863	regulation of T cell activation	0.862069	4.1894e-05	0.0324391
GO:0009605	response to external stimulus	1.64706	1.47361e-05	0.0263812
GO:0009611	response to wounding	2.2	5.45142e-07	0.00597735
GO:0007165	signal transduction	0.950508	3.65599e-05	0.0324391
GO:0042330	taxis	5.03145	5.52064e-06	0.0181679
(TB+LTBI)/HC
GO ACCESSION	GO Term	Percent(%)	P-value	Corrected P-value
GO:0046013	regulation of T cell homeostatic proliferation	66.6667	7.23822e-06	0.0401971
TB/(LTBI+HC)
GO ACCESSION	GO Term	Percent(%)	P-value	Corrected P-value
GO:0009605	response to external stimulus	2.54	0	0.0008
GO:0042330	taxis	4.68	0.0001	0.0161
